# Supplementary material for: Photoproperties of favipiravir and its 6-substituted analogues: fluorescence controlled through halogen substitution and tautomerism
Source: Royal Society of Chemistry journal article supplement (doi:10.1039/d4ob00397g), 2024-01-01
Supplement: d4ob00397g1.pdf [file d4ob00397g1.pdf]

## SUPPORTING INFORMATION FOR:

### Photoproperties of Favipiravir and their 6-Substituted Analogues: Fluorescence Controlled through Halogen Substitution and Tautomerism

Germán Fuentes,<sup>a</sup> Ivan E. Romero,<sup>b</sup> Matías N. Moller,<sup>c</sup> Marcos Couto<sup>a</sup> and Angel H. Romero<sup>a</sup>

<sup>a</sup>*Grupo de Química Orgánica Medicinal, Instituto de Química Biológica, Facultad de Ciencias, Universidad de la República, Iguá 4225, 11400 Montevideo, Uruguay.*

<sup>b</sup>*Laboratorio de Síntesis Orgánica, Escuela de Química, Facultad de Ciencias, Universidad Central de Venezuela, Los Chaguaramos 1040, Caracas, Venezuela.*

<sup>c</sup>*Laboratorio de Fisicoquímica Biológica, Instituto de Química Biológica, Facultad de Ciencias, Universidad de la República, Iguá 4225, 11400 Montevideo, Uruguay.*

### Table of Content

|                                   |     |
|-----------------------------------|-----|
| 1. Experimental data.....         | S2  |
| 2. Theoretical Output.....        | S4  |
| 3. Lifetime ISS measurements..... | S39 |

## 1. Experimental Data

**Table S1.** Absorptivity data of the 3-hydroxy-2-pyrazinecarboxamides **1a-e** in different solvents.

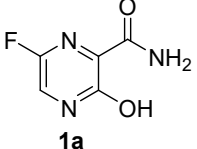

**1a**



**1b**



**1c**



**1d**



**1e**

| Entries | Comps     | H <sub>2</sub> O | MeOH   | EtOH   | i-PrOH  | DMSO   | MeCN   | <i>n</i> -hexane | DMF    |
|---------|-----------|------------------|--------|--------|---------|--------|--------|------------------|--------|
| 1       | <b>1a</b> | 4723.2           | 4037.7 | 4300.5 | 5542.1  | 3935.7 | 1140.2 | 1710.4           | 5633.8 |
| 2       | <b>1b</b> | 12825            | 13470  | 6913.3 | 13156.2 | 5608.1 | 5731.9 | 989.1            | -----  |
| 3       | <b>1c</b> | 6028.1           | 4078.9 | 5194.9 | 6066.6  | 5302.9 | 5230.1 | 1342.2           | -----  |
| 4       | <b>1d</b> | 9137.9           | 5133.4 | 6042.2 | 6356.7  | 6936.9 | ---    | ----             | ----   |
| 5       | <b>1e</b> | 4502.1           | 2822.6 | 2346.7 | 2438.5  | 2567.4 | ---    | ----             | ----   |

<sup>a</sup>Molar absorptivity expressed in M<sup>-1</sup>.cm<sup>-1</sup>. Molar absorptivities were determined plotting maximum absorbance as function of pyrazine concentration. Molar absorptivities were calculated as a mean derived from three independent measurement with SD below 5%.

**Table S2.** Gradient plots for the quantum yield (Q.Y.) calculations for the LE state of the 6-fluoro-3-hydroxy-2-pyrazinecarboxamide **1a** in different solvents upon 360 nm.

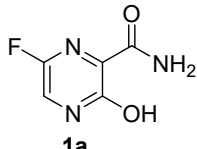

**1a**

| Entries | Solvent                       | <i>Grad (1a)</i> | Q.Y. (Fl)    | Q.Y. (Trp)   |
|---------|-------------------------------|------------------|--------------|--------------|
| 1       | <b>H<sub>2</sub>O</b>         | 8870.5 ± 1.2%    | ~ 1.0 ± 1.6% | ~ 1.0 ± 1.2% |
| 2       | <b>MeOH</b>                   | 4970.7 ± 1.5%    | 0.778 ± 1.9% | 0.781 ± 1.6% |
| 3       | <b>EtOH</b>                   | 6400.1 ± 1.9%    | 0.960 ± 1.1% | 0.971 ± 1.9% |
| 4       | <b>i-PrOH</b>                 | 5199.6 ± 2.2%    | 0.789 ± 2.3% | 0.782 ± 2.4% |
| 5       | <b>DMSO</b>                   | 2001.0 ± 2.1%    | 0.325 ± 1.9% | 0.323 ± 3.2% |
| 6       | <b>MeCN</b>                   | 2246.1 ± 3.3%    | 0.332 ± 2.7% | 0.329 ± 3.8% |
| 7       | <b>DMF</b>                    | 325.2 ± 4.5%     | 0.051 ± 4.1% | 0.051 ± 4.5% |
| 8       | <b><i>n</i>-Hexane</b>        | 79.9 ± 4.7%      | 0.012 ± 4.0% | 0.012 ± 5.6% |
|         | <i>Grad (Fl)<sup>a</sup></i>  | 6263.2 ± 1.4%    |              |              |
|         | <i>Grad (Trp)<sup>b</sup></i> | 824.6 ± 3.8%     |              |              |

Gradient obtained for fluorescein<sup>a</sup> and tryptophan. **Notes:** Coefficient correlation were more than 0.9940 for obtaining gradient plots [Grad (**1a**), Grad (Fl) or Grad (Trp)]. Measurement either for the favipiravir under each solvent or for reference fluorophore were performed by triplicate. Gradients were calculated from eight to ten concentrations.

**Table S3.** Gradient plots for the quantum yield (Q.Y.) calculations for LE state of the 6-chloro-3-hydroxy-2-pyrazinecarboxamide **1b** in different solvents upon 360 nm.

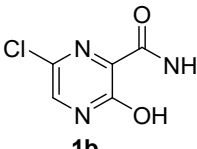

**1b**

| Entries | Solvent                       | <i>Grad (1b)</i> | Q.Y. (Fl)    | Q.Y. (Trp)   |
|---------|-------------------------------|------------------|--------------|--------------|
| 1       | <b>H<sub>2</sub>O</b>         | 1061.2 ± 2.3%    | 0.156 ± 1.9% | 0.154 ± 2.2% |
| 2       | <b>MeOH</b>                   | 121.7 ± 2.6%     | 0.018 ± 2.9% | 0.018 ± 2.6% |
| 3       | <b>EtOH</b>                   | 171.9 ± 1.9%     | 0.025 ± 2.1% | 0.025 ± 2.9% |
| 4       | <b>i-PrOH</b>                 | 97.56 ± 2.9%     | 0.014 ± 3.3% | 0.014 ± 3.9% |
| 5       | <b>DMSO</b>                   | 25.3 ± 4.1%      | 0.004 ± 2.5% | 0.004 ± 4.2% |
| 6       | <b>MeCN</b>                   | 59.2 ± 4.3%      | 0.009 ± 3.6% | 0.009 ± 3.8% |
| 7       | <b><i>n</i>-Hexane</b>        | 8.0 ± 5.3%       | 0.001 ± 5.0% | 0.001 ± 5.6% |
|         | <i>Grad (Fl)<sup>a</sup></i>  | 6263.2 ± 1.4%    |              |              |
|         | <i>Grad (Trp)<sup>b</sup></i> | 824.6 ± 3.8%     |              |              |

Gradient obtained for fluorescein<sup>a</sup> and tryptophan. **Notes:** Coefficient correlation were more than 0.9940 for obtaining gradient plots [Grad (**1b**), Grad (Fl) or Grad (Trp)]. Measurement either for **1b** under each solvent or for reference fluorophore were performed by triplicate. Gradients were calculated from eight to ten concentrations.

**Table S4.** Gradient plots for the quantum yield (Q.Y.) calculations for the LE state of the 6-bromo-3-hydroxy-2-pyrazinecarboxamide **1c** in different solvents upon 360 nm.

| 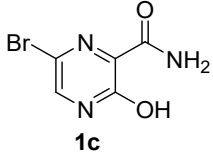 | Entries                 | Solvent          | Grad ( <b>1b</b> ) | Q.Y. (Fl)     | Q.Y. (Trp)    |
|-----------------------------------------------------------------------------------|-------------------------|------------------|--------------------|---------------|---------------|
|                                                                                   | 1                       | H <sub>2</sub> O | 615.9 ± 2.8%       | 0.090 ± 2.9%  | 0.090 ± 3.2%  |
|                                                                                   | 2                       | MeOH             | 117.1 ± 2.5%       | 0.017 ± 3.9%  | 0.017 ± 3.5%  |
|                                                                                   | 3                       | EtOH             | 46.19 ± 3.2%       | 0.007 ± 3.1%  | 0.007 ± 3.7%  |
|                                                                                   | 4                       | i-PrOH           | 27.1 ± 3.6%        | 0.004 ± 3.3%  | 0.004 ± 3.9%  |
|                                                                                   | 5                       | DMSO             | 2.1 ± 5.1%         | 0.0003 ± 5.5% | 0.0003 ± 6.2% |
|                                                                                   | 6                       | MeCN             | 13.9 ± 5.3%        | 0.002 ± 4.9%  | 0.002 ± 4.8%  |
|                                                                                   | 7                       | n-Hexane         | 0.1 ± 5.7%         | 0.0001 ± 5.9% | 0.0001 ± 6.6% |
|                                                                                   | Grad (Fl) <sup>a</sup>  | 6263.2 ± 1.4%    |                    |               |               |
|                                                                                   | Grad (Trp) <sup>b</sup> | 824.6 ± 3.8%     |                    |               |               |

Gradient obtained for fluorescein<sup>a</sup> and tryptophan. **Notes:** Coefficient correlation were more than 0.9940 for obtaining gradient plots [Grad (**1c**), Grad (Fl) or Grad (Trp)]. Measurement either for **1c** under each solvent or for reference fluorophore were performed by triplicate. Gradients were calculated from eight to ten concentrations.

**Table S5.** Gradient plots for the quantum yield (Q.Y.) calculations for the LE state of the 6-iodo-3-hydroxy-2-pyrazinecarboxamide **1d** and 3-hydroxy-2-pyrazinecarboxamide **1e** in different solvents upon 360 nm.

| 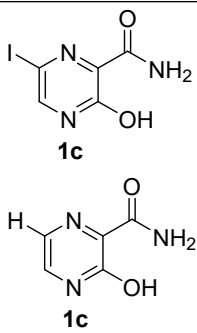 | Entries                 | Solvent                        | Grad ( <b>1b</b> ) | Q.Y. (Fl)      | Q.Y. (Trp)     |
|------------------------------------------------------------------------------------|-------------------------|--------------------------------|--------------------|----------------|----------------|
|                                                                                    | 1                       | H <sub>2</sub> O ( <b>1d</b> ) | 1.80 ± 4.8%        | 0.0003 ± 2.6%  | 0.0002 ± 4.1%  |
|                                                                                    | 2                       | H <sub>2</sub> O ( <b>1e</b> ) | 21.38 ± 3.5%       | 0.00314 ± 3.9% | 0.00311 ± 3.5% |
|                                                                                    | 3                       | MeOH ( <b>1e</b> )             | 1.01 ± 4.3%        | 0.00014 ± 4.5% | 0.00014 ± 3.7% |
|                                                                                    | 4                       | EtOH ( <b>1e</b> )             | 0.93 ± 4.7%        | 0.00014 ± 4.9% | 0.00013 ± 3.9% |
|                                                                                    | 5                       | i-PrOH ( <b>1e</b> )           | 0.21 ± 5.1%        | 0.00003 ± 5.5% | 0.00003 ± 6.2% |
|                                                                                    | 6                       | DMSO ( <b>1e</b> )             | 0.00 ± 6.1%        | 0.0 ± 4.9%     | 0.00 ± 4.8%    |
|                                                                                    | 7                       | MeCN ( <b>1e</b> )             | 0.01 ± 5.7%        | 0.00001 ± 5.9% | 0.00001 ± 6.6% |
|                                                                                    | Grad (Fl) <sup>a</sup>  | 6263.2 ± 1.4%                  |                    |                |                |
|                                                                                    | Grad (Trp) <sup>b</sup> | 824.6 ± 3.8%                   |                    |                |                |

Gradient obtained for fluorescein<sup>a</sup> and tryptophan. **Notes:** Coefficient correlation were more than 0.9940 for obtaining gradient plots [Grad (**1d** or **1e**), Grad (Fl) or Grad (Trp)]. Measurement either for **1d** and **1e** under each solvent or for reference fluorophore were performed by triplicate. Gradients were calculated from eight to ten concentrations.

**Table S6.** Lifetimes (ns) for the tested 3-hydroxy-2-pyrazinecarboxamides **1a-e** with standard deviation (SD) under water solution.

|           | 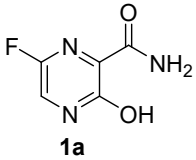 |  |  |  |  |
|-----------|-------------------------------------------------------------------------------------|-------------------------------------------------------------------------------------|-------------------------------------------------------------------------------------|--------------------------------------------------------------------------------------|---------------------------------------------------------------------------------------|
|           | $\tau_1$ (ns)                                                                       | $\tau_2$ (ns)                                                                       |                                                                                     | $\tau_3$ (ns)                                                                        | $\chi^2$                                                                              |
| <b>1a</b> | 10.1 ± 0.03 (100%)                                                                  |                                                                                     |                                                                                     |                                                                                      | 0.878                                                                                 |
| <b>1b</b> | 10.2 ± 0.03 (100%)                                                                  |                                                                                     |                                                                                     |                                                                                      | 1.00                                                                                  |
| <b>1c</b> | 4.88 ± 0.03 (90.46%)                                                                | 0.203 ± 0.04 (9.54%)                                                                |                                                                                     |                                                                                      | ~ 1.00                                                                                |
| <b>1d</b> | 10.6 ± 0.06 (81.78%)                                                                | 0.242 ± 0.02 (18.22%)                                                               |                                                                                     |                                                                                      | ~ 1.00                                                                                |
| <b>1e</b> | 9.12 ± 0.50 (17.73%)                                                                | 0.102 ± 0.09 (44.46%)                                                               |                                                                                     | 1.84 ± 0.05 (37.91%)                                                                 | ~ 1.00                                                                                |

## 2. Theoretical Output

### 2.1. Geometry optimization of ground-state of enol tautomers

#### 2.1.1. 6-Fluoro-3-hydroxy-2-pyrazinecarboxamide 1a

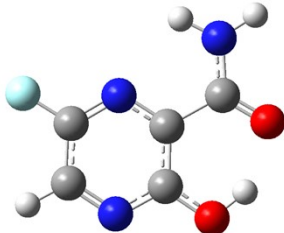

#### Optimization:

Requested convergence on RMS density matrix=1.00D-08 within 128 cycles.

Requested convergence on MAX density matrix=1.00D-06.

Requested convergence on energy=1.00D-06.

No special actions if energy rises.

SCF Done: E(RM062X) = -607.532703121 A.U. after 15 cycles

Conv = 0.9306D-08 -V/T = 2.0042

1 Symmetry operations used in ECPInt.

ECPInt: NShTT= 9453 NPrTT= 30144 LenC2= 8988 LenP2D= 21935.

LDataN: DoStor=T MaxTD1= 7 Len= 274

Calling FoFJK, ICntrl= 2127 FMM=F ISym2X=0 IICent= 0 IOpClX= 0 NMat=1 NMatS=1  
NMatT=0.

\*\*\*\*\* Axes restored to original set \*\*\*\*\*

| Center<br>Number | Atomic<br>Number | Forces (Hartrees/Bohr) |              |              |
|------------------|------------------|------------------------|--------------|--------------|
|                  |                  | X                      | Y            | Z            |
| 1                | 6                | -0.000245085           | 0.000089403  | -0.000013888 |
| 2                | 6                | -0.000046814           | -0.000171404 | -0.000054853 |
| 3                | 7                | -0.000039517           | 0.000079359  | -0.000007116 |
| 4                | 6                | 0.000098484            | -0.000088514 | 0.000010070  |
| 5                | 6                | -0.000121082           | -0.000172310 | 0.000003267  |
| 6                | 7                | 0.000302047            | 0.000101187  | 0.000005407  |
| 7                | 1                | 0.000045379            | 0.000012589  | -0.000003637 |
| 8                | 6                | 0.000104998            | 0.000108143  | 0.000170536  |
| 9                | 8                | 0.000044350            | -0.000127007 | -0.000058300 |
| 10               | 7                | -0.000039350           | 0.000012791  | -0.000042468 |
| 11               | 1                | 0.000017918            | 0.000011982  | -0.000002129 |
| 12               | 1                | 0.000014476            | 0.000006909  | -0.000007298 |
| 13               | 8                | -0.000009883           | 0.000005108  | 0.000016501  |
| 14               | 1                | -0.000182285           | -0.000019968 | -0.000015703 |
| 15               | 9                | 0.000056365            | 0.000151733  | -0.000000387 |

Cartesian Forces: Max 0.000302047 RMS 0.000095978

**Mulliken atomic charges:**

1 C 0.266641  
2 C 0.059600  
3 N -0.254830  
4 C 0.224173  
5 C -0.103796  
6 N -0.176618  
7 H 0.168075  
8 C 0.379221  
9 O -0.446855  
10 N -0.472717  
11 H 0.268337  
12 H 0.287665  
13 O -0.393450  
14 H 0.375289  
15 F -0.180735

Sum of Mulliken atomic charges = 0.00000

Mulliken charges with hydrogens summed into heavy atoms:

1 C 0.266641  
2 C 0.059600  
3 N -0.254830  
4 C 0.224173  
5 C 0.064279  
6 N -0.176618  
8 C 0.379221  
9 O -0.446855  
10 N 0.083285  
13 O -0.018161  
15 F -0.180735

Sum of Mulliken charges with hydrogens summed into heavy atoms = 0.00000

Electronic spatial extent (au):  $\langle R^{*2} \rangle = 1608.9173$

Charge= 0.0000 electrons

*2.1.2. 6-Chloro-3-hydroxy-2-pyrazinecarboxamide 1b*

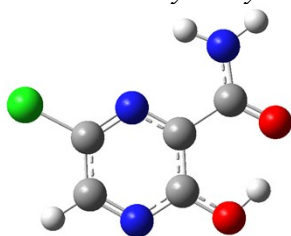

**Optimization:**

Requested convergence on RMS density matrix=1.00D-08 within 128 cycles.

Requested convergence on MAX density matrix=1.00D-06.

Requested convergence on energy=1.00D-06.

No special actions if energy rises.

SCF Done: E(RM062X) = -967.879526877 A.U. after 8 cycles

Conv = 0.3818D-08 -V/T = 2.0027

1 Symmetry operations used in ECPInt.

ECPInt: NShTT= 9730 NPrTT= 31894 LenC2= 9209 LenP2D= 22728.

LDataN: DoStor=T MaxTD1= 7 Len= 274

Calling FoFJK, ICntrl= 2127 FMM=F ISym2X=0 IICent= 0 IOpCIX= 0 NMat=1 NMatS=1  
NMatT=0.

\*\*\*\*\* Axes restored to original set \*\*\*\*\*

| Center<br>Number | Atomic<br>Number | Forces (Hartrees/Bohr) |              |              |
|------------------|------------------|------------------------|--------------|--------------|
|                  |                  | X                      | Y            | Z            |
| 1                | 6                | -0.000045348           | 0.000026638  | -0.000006349 |
| 2                | 6                | -0.000021752           | -0.000016730 | -0.000011246 |
| 3                | 7                | 0.000021311            | -0.000012212 | -0.000001444 |
| 4                | 6                | -0.000003474           | 0.000030521  | 0.000001982  |
| 5                | 6                | -0.000014946           | -0.000074573 | 0.000001198  |
| 6                | 7                | 0.000054937            | 0.000043594  | 0.000001088  |
| 7                | 1                | 0.000013509            | 0.000021655  | -0.000000931 |
| 8                | 6                | 0.000029500            | 0.000004619  | 0.000034703  |
| 9                | 8                | -0.000005891           | -0.000025551 | -0.000007126 |
| 10               | 7                | -0.000022078           | -0.000015903 | -0.000009544 |
| 11               | 1                | 0.000004634            | 0.000000127  | -0.000000014 |
| 12               | 1                | -0.000000303           | -0.000002807 | -0.000001386 |
| 13               | 8                | -0.000001053           | -0.000023131 | 0.000014295  |
| 14               | 1                | -0.000011629           | 0.000011967  | -0.000015198 |
| 15               | 17               | 0.000002583            | 0.000031787  | -0.000000028 |

Cartesian Forces: Max 0.000074573 RMS 0.000022391

**Mulliken atomic charges:**

1 C 0.269531  
2 C 0.056571  
3 N -0.254927  
4 C 0.070037  
5 C -0.078877  
6 N -0.180941  
7 H 0.169075  
8 C 0.380336  
9 O -0.446345  
10 N -0.471582  
11 H 0.268480  
12 H 0.288254  
13 O -0.389277  
14 H 0.376557  
15 Cl -0.056891

Sum of Mulliken atomic charges = 0.00000

Mulliken charges with hydrogens summed into heavy atoms:

1 C 0.269531  
2 C 0.056571  
3 N -0.254927  
4 C 0.070037  
5 C 0.090198  
6 N -0.180941  
8 C 0.380336  
9 O -0.446345  
10 N 0.085152  
13 O -0.012720  
15 Cl -0.056891

Sum of Mulliken charges with hydrogens summed into heavy atoms = 0.00000

Electronic spatial extent (au):  $\langle R^{*2} \rangle =$  2032.2104

Charge= 0.0000 electrons

### 2.1.3. 6-Bromo-3-hydroxy-2-pyrazinecarboxamide 1c

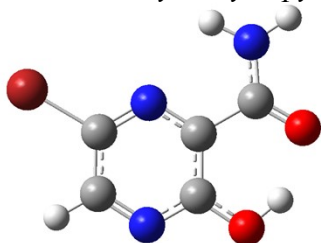

#### Optimization:

Requested convergence on RMS density matrix=1.00D-08 within 128 cycles.

Requested convergence on MAX density matrix=1.00D-06.

Requested convergence on energy=1.00D-06.

No special actions if energy rises.

SCF Done: E(RM062X) = -3081.87247924 A.U. after 15 cycles

Conv = 0.8553D-08 -V/T = 2.0018

1 Symmetry operations used in ECPInt.

ECPInt: NShTT= 10153 NPrTT= 35014 LenC2= 9582 LenP2D= 24404.

LDataN: DoStor=T MaxTD1= 7 Len= 274

Calling FoFJK, ICntrl= 2127 FMM=F ISym2X=0 IICent= 0 IOpClX= 0 NMat=1 NMatS=1  
NMatT=0.

\*\*\*\*\* Axes restored to original set \*\*\*\*\*

| Center<br>Number | Atomic<br>Number | Forces (Hartrees/Bohr) |              |              |
|------------------|------------------|------------------------|--------------|--------------|
|                  |                  | X                      | Y            | Z            |
| 1                | 6                | -0.000087097           | 0.000048909  | -0.000007303 |
| 2                | 6                | -0.000073377           | -0.000086929 | -0.000015674 |
| 3                | 7                | 0.000021648            | 0.000054584  | -0.000002209 |
| 4                | 6                | -0.000002737           | 0.000048777  | 0.000002859  |

|    |    |              |              |              |
|----|----|--------------|--------------|--------------|
| 5  | 6  | -0.000009231 | -0.000002485 | 0.000001305  |
| 6  | 7  | 0.000110657  | 0.000014469  | 0.000001536  |
| 7  | 1  | 0.000014142  | 0.000051968  | -0.000001119 |
| 8  | 6  | 0.000076877  | -0.000007471 | 0.000049349  |
| 9  | 8  | 0.000013519  | -0.000080662 | -0.000012961 |
| 10 | 7  | -0.000030940 | -0.000027188 | -0.000012663 |
| 11 | 1  | -0.000002820 | -0.000031421 | -0.000000470 |
| 12 | 1  | -0.000019189 | -0.000015464 | -0.000001996 |
| 13 | 8  | 0.000034076  | -0.000023523 | 0.000014835  |
| 14 | 1  | -0.000015973 | 0.000014850  | -0.000015417 |
| 15 | 35 | -0.000029555 | 0.000041584  | -0.000000072 |

-----  
 Cartesian Forces: Max 0.000110657 RMS 0.000039013

**Mulliken atomic charges:**

1 C 0.272182  
 2 C 0.058462  
 3 N -0.260077  
 4 C 0.078046  
 5 C -0.077013  
 6 N -0.179190  
 7 H 0.174175  
 8 C 0.380898  
 9 O -0.446926  
 10 N -0.471987  
 11 H 0.268685  
 12 H 0.288195  
 13 O -0.387619  
 14 H 0.376745  
 15 Br -0.074577

Sum of Mulliken atomic charges = 0.00000

Mulliken charges with hydrogens summed into heavy atoms:

1 C 0.272182  
 2 C 0.058462  
 3 N -0.260077  
 4 C 0.078046  
 5 C 0.097162  
 6 N -0.179190  
 8 C 0.380898  
 9 O -0.446926  
 10 N 0.084894  
 13 O -0.010874  
 15 Br -0.074577

Sum of Mulliken charges with hydrogens summed into heavy atoms = 0.00000

Electronic spatial extent (au):  $\langle R^{*2} \rangle =$  2698.6689

Charge= 0.0000 electrons



2.1.4. 6-Iodo-3-hydroxy-2-pyrazinecarboxamide **1d**

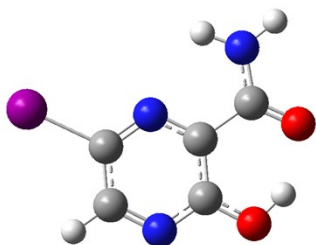

**Optimization:**

SCF Done: E(RM062X) = -805.307041384 A.U. after 8 cycles

Conv = 0.5542D-08 -V/T = 2.3011

1 Symmetry operations used in ECPInt.

ECPInt: NShTT= 10153 NPrTT= 32907 LenC2= 9588 LenP2D= 23494.

LDDataN: DoStor=T MaxTD1= 7 Len= 274

Calling FoFJK, ICntrl= 2127 FMM=F ISym2X=0 IICent= 0 IOpCIX= 0 NMat=1 NMatS=1  
NMatT=0.

Defaulting to unpruned grid for atomic number 53.

\*\*\*\*\* Axes restored to original set \*\*\*\*\*

| Center<br>Number | Atomic<br>Number | Forces (Hartrees/Bohr) |              |              |
|------------------|------------------|------------------------|--------------|--------------|
|                  |                  | X                      | Y            | Z            |
| 1                | 6                | -0.000023447           | 0.000020777  | -0.000005473 |
| 2                | 6                | -0.000055024           | -0.000025186 | -0.000004628 |
| 3                | 7                | -0.000000317           | 0.000001063  | -0.000000591 |
| 4                | 6                | 0.000007717            | 0.000036742  | 0.000000637  |
| 5                | 6                | -0.000009362           | -0.000008690 | 0.000000857  |
| 6                | 7                | 0.000036448            | -0.000028482 | 0.000000500  |
| 7                | 1                | 0.000007048            | 0.000002066  | -0.000000496 |
| 8                | 6                | 0.000061092            | 0.000013772  | 0.000015191  |
| 9                | 8                | -0.000000862           | -0.000045437 | -0.000000249 |
| 10               | 7                | -0.000023311           | -0.000004536 | -0.000004612 |
| 11               | 1                | 0.000006700            | 0.000011362  | 0.000000136  |
| 12               | 1                | 0.000003788            | 0.000005418  | -0.000000352 |
| 13               | 8                | 0.000010869            | -0.000018127 | 0.000013881  |
| 14               | 1                | -0.000039891           | 0.000031701  | -0.000014790 |
| 15               | 53               | 0.000018551            | 0.000007557  | -0.000000011 |

Cartesian Forces: Max 0.000061092 RMS 0.000020732

**Mulliken atomic charges:**

1 C 0.276468  
2 C 0.054796  
3 N -0.279104  
4 C 0.086251  
5 C -0.089001  
6 N -0.177329  
7 H 0.177328  
8 C 0.378686  
9 O -0.447024  
10 N -0.471890  
11 H 0.268404  
12 H 0.288041  
13 O -0.387488  
14 H 0.376777  
15 I -0.054914

Sum of Mulliken atomic charges = 0.00000

Mulliken charges with hydrogens summed into heavy atoms:

1 C 0.276468  
2 C 0.054796  
3 N -0.279104  
4 C 0.086251  
5 C 0.088327  
6 N -0.177329  
8 C 0.378686  
9 O -0.447024  
10 N 0.084555  
13 O -0.010711  
15 I -0.054914

Sum of Mulliken charges with hydrogens summed into heavy atoms = 0.00000

Electronic spatial extent (au):  $\langle R^{*2} \rangle = 2706.9816$

Charge= 0.0000 electrons

*2.1.5. 3-Hydroxy-2-pyrazinecarboxamide 1e*

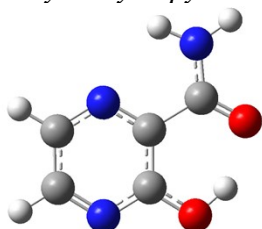

**Optimization:**

Requested convergence on RMS density matrix=1.00D-08 within 128 cycles.

Requested convergence on MAX density matrix=1.00D-06.

Requested convergence on energy=1.00D-06.  
 No special actions if energy rises.  
 SCF Done: E(RM062X) = -508.276769054 A.U. after 15 cycles  
 Conv = 0.6113D-08 -V/T = 2.0044  
 1 Symmetry operations used in ECPInt.  
 ECPInt: NShTT= 8515 NPrTT= 26800 LenC2= 8222 LenP2D= 20139.  
 LDataN: DoStor=T MaxTD1= 7 Len= 274  
 Calling FoFJK, ICntrl= 2127 FMM=F ISym2X=0 IICent= 0 IOpClX= 0 NMat=1  
 NMatS=1 NMatT=0.  
 \*\*\*\*\* Axes restored to original set \*\*\*\*\*

| Center<br>Number | Atomic<br>Number | Forces (Hartrees/Bohr) |              |              |
|------------------|------------------|------------------------|--------------|--------------|
|                  |                  | X                      | Y            | Z            |
| 1                | 6                | 0.000140870            | -0.000081276 | 0.000008430  |
| 2                | 6                | -0.000098137           | 0.000120400  | -0.000012924 |
| 3                | 7                | -0.000004626           | -0.000118085 | 0.000004358  |
| 4                | 6                | 0.000096446            | 0.000011407  | -0.000004180 |
| 5                | 6                | -0.000045809           | 0.000001836  | 0.000000025  |
| 6                | 7                | -0.000014870           | -0.000045274 | -0.000002291 |
| 7                | 1                | 0.000015018            | -0.000007070 | -0.000000407 |
| 8                | 6                | -0.000104879           | 0.000209569  | 0.000031485  |
| 9                | 8                | 0.000040176            | -0.000111288 | -0.000006093 |
| 10               | 7                | 0.000048804            | -0.000063679 | -0.000015444 |
| 11               | 1                | -0.000046180           | 0.000007836  | 0.000002848  |
| 12               | 1                | 0.000002191            | 0.000012074  | 0.000000281  |
| 13               | 8                | 0.000016807            | 0.000105156  | 0.000009209  |
| 14               | 1                | -0.000052807           | -0.000051075 | -0.000016058 |
| 15               | 1                | 0.000006996            | 0.000009468  | 0.000000762  |

Cartesian Forces: Max 0.000209569 RMS 0.000062378

**Mulliken atomic charges:**

1 C 0.272035  
 2 C 0.052881  
 3 N -0.273008  
 4 C -0.106598  
 5 C -0.042507  
 6 N -0.192020  
 7 H 0.152976  
 8 C 0.375042  
 9 O -0.449885  
 10 N -0.471380  
 11 H 0.265982  
 12 H 0.284315  
 13 O -0.392398  
 14 H 0.375065

15 H 0.149500  
 Sum of Mulliken atomic charges = 0.00000  
 Mulliken charges with hydrogens summed into heavy atoms:  
 1 C 0.272035  
 2 C 0.052881  
 3 N -0.273008  
 4 C 0.042902  
 5 C 0.110469  
 6 N -0.192020  
 8 C 0.375042  
 9 O -0.449885  
 10 N 0.078917  
 13 O -0.017333  
 Sum of Mulliken charges with hydrogens summed into heavy atoms = 0.00000  
 Electronic spatial extent (au):  $\langle R^{*2} \rangle = 1275.8697$   
 Charge = 0.0000 electrons

## 2.2. Geometry optimization of ground-state of keto tautomers

### 2.2.1. 6-Fluoro-3-oxo-3,4-dihydropyrazine-2-carboxamide **1a**

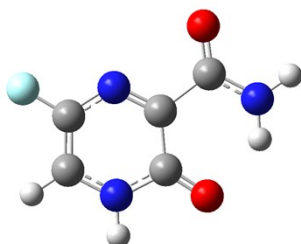

#### Optimization:

Requested convergence on RMS density matrix=1.00D-08 within 128 cycles.

Requested convergence on MAX density matrix=1.00D-06.

Requested convergence on energy=1.00D-06.

No special actions if energy rises.

SCF Done: E(RM062X) = -607.511392262 A.U. after 16 cycles

Conv = 0.7899D-08 -V/T = 2.0042

1 Symmetry operations used in ECPInt.

ECPInt: NShTT= 9453 NPrTT= 30144 LenC2= 8962 LenP2D= 21828.

LDataN: DoStor=T MaxTD1= 7 Len= 274

Calling FoFJK, ICntrl= 2127 FMM=F ISym2X=0 IICent= 0 IOpClX= 0 NMat=1 NMatS=1  
 NMatT=0.

\*\*\*\*\* Axes restored to original set \*\*\*\*\*

| Center<br>Number | Atomic<br>Number | Forces (Hartrees/Bohr) |             |             |
|------------------|------------------|------------------------|-------------|-------------|
|                  |                  | X                      | Y           | Z           |
| 1                | 6                | -0.000102824           | 0.000044201 | 0.000009611 |

|    |   |              |              |              |
|----|---|--------------|--------------|--------------|
| 2  | 6 | 0.000020126  | 0.000001305  | -0.000001924 |
| 3  | 7 | -0.000035998 | -0.000019843 | -0.000000384 |
| 4  | 6 | 0.000019191  | -0.000044218 | -0.000002389 |
| 5  | 6 | -0.000010227 | 0.000006436  | -0.000000145 |
| 6  | 7 | 0.000077711  | -0.000025843 | -0.000003528 |
| 7  | 1 | -0.000005172 | -0.000043615 | 0.000000365  |
| 8  | 6 | -0.000007907 | 0.000003765  | 0.000011491  |
| 9  | 8 | -0.000006998 | 0.000024570  | -0.000005202 |
| 10 | 7 | 0.000015127  | 0.000043849  | -0.000004589 |
| 11 | 1 | 0.000008771  | 0.000027331  | 0.000000644  |
| 12 | 1 | 0.000003102  | 0.000014373  | -0.000000905 |
| 13 | 8 | 0.000070513  | -0.000038634 | -0.000004153 |
| 14 | 1 | 0.000003988  | -0.000009643 | 0.000000549  |
| 15 | 9 | -0.000049403 | 0.000015966  | 0.000000559  |

-----  
 Cartesian Forces: Max 0.000102824 RMS 0.000029527

**Mulliken atomic charges:**

|      |           |
|------|-----------|
| 1 C  | 0.325006  |
| 2 C  | -0.037513 |
| 3 N  | -0.092412 |
| 4 C  | 0.230189  |
| 5 C  | -0.059198 |
| 6 N  | -0.235976 |
| 7 H  | 0.184342  |
| 8 C  | 0.281975  |
| 9 O  | -0.322982 |
| 10 N | -0.489396 |
| 11 H | 0.256647  |
| 12 H | 0.300330  |
| 13 O | -0.430466 |
| 14 H | 0.266397  |
| 15 F | -0.176944 |

Sum of Mulliken atomic charges = 0.00000

Mulliken charges with hydrogens summed into heavy atoms:

|      |           |
|------|-----------|
| 1 C  | 0.325006  |
| 2 C  | -0.037513 |
| 3 N  | -0.092412 |
| 4 C  | 0.230189  |
| 5 C  | 0.125144  |
| 6 N  | 0.030421  |
| 8 C  | 0.281975  |
| 9 O  | -0.322982 |
| 10 N | 0.067581  |
| 13 O | -0.430466 |
| 15 F | -0.176944 |

Sum of Mulliken charges with hydrogens summed into heavy atoms = 0.00000  
 Electronic spatial extent (au):  $\langle R^{*2} \rangle =$  1641.6712  
 Charge= 0.0000 electrons

### 2.2.2. 6-Chloro-3-oxo-3,4-dihydropyrazine-2-carboxamide **1b**

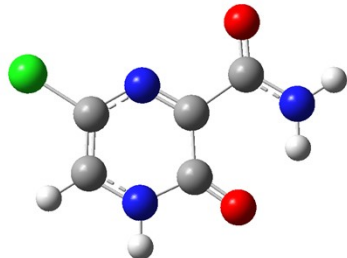

#### Optimization:

Requested convergence on RMS density matrix=1.00D-08 within 128 cycles.

Requested convergence on MAX density matrix=1.00D-06.

Requested convergence on energy=1.00D-06.

No special actions if energy rises.

SCF Done: E(RM062X) = -967.859397254 A.U. after 16 cycles

Conv = 0.6093D-08 -V/T = 2.0027

1 Symmetry operations used in ECPInt.

ECPInt: NShTT= 9730 NPrTT= 31894 LenC2= 9180 LenP2D= 22598.

LDataN: DoStor=T MaxTD1= 7 Len= 274

Calling FoFJK, ICntrl= 2127 FMM=F ISym2X=0 IICent= 0 IOpCIX= 0 NMat=1 NMatS=1  
 NMatT=0.

\*\*\*\*\* Axes restored to original set \*\*\*\*\*

| Center<br>Number | Atomic<br>Number | Forces (Hartrees/Bohr) |              |              |
|------------------|------------------|------------------------|--------------|--------------|
|                  |                  | X                      | Y            | Z            |
| 1                | 6                | -0.000119154           | -0.000024373 | -0.000029431 |
| 2                | 6                | -0.000022144           | 0.000024909  | 0.000062628  |
| 3                | 7                | 0.000093165            | -0.000141300 | 0.000004533  |
| 4                | 6                | -0.000035776           | 0.000228457  | -0.000009041 |
| 5                | 6                | -0.000015272           | -0.000089561 | 0.000002882  |
| 6                | 7                | 0.000099495            | 0.000008067  | 0.000003939  |
| 7                | 1                | -0.000006182           | -0.000016595 | 0.000001611  |
| 8                | 6                | 0.000025489            | 0.000014315  | -0.000165156 |
| 9                | 8                | -0.000001896           | 0.000008637  | 0.000067837  |
| 10               | 7                | -0.000096888           | -0.000033914 | 0.000037078  |
| 11               | 1                | -0.000014209           | -0.000014772 | 0.000000159  |
| 12               | 1                | -0.000019714           | -0.000005052 | 0.000011369  |
| 13               | 8                | 0.000135650            | 0.000071065  | 0.000011639  |
| 14               | 1                | -0.000027696           | 0.000013759  | 0.000000047  |
| 15               | 17               | 0.000005133            | -0.000043643 | -0.000000095 |

Cartesian Forces: Max 0.000228457 RMS 0.000065597

**Mulliken atomic charges:**

1 C 0.327313  
2 C -0.048573  
3 N -0.093157  
4 C 0.072663  
5 C -0.024592  
6 N -0.238195  
7 H 0.183404  
8 C 0.283896  
9 O -0.322095  
10 N -0.490183  
11 H 0.256697  
12 H 0.299244  
13 O -0.423707  
14 H 0.266062  
15 Cl -0.048778

Sum of Mulliken atomic charges = 0.00000

Mulliken charges with hydrogens summed into heavy atoms:

1 C 0.327313  
2 C -0.048573  
3 N -0.093157  
4 C 0.072663  
5 C 0.158813  
6 N 0.027867  
8 C 0.283896  
9 O -0.322095  
10 N 0.065758  
13 O -0.423707  
15 Cl -0.048778

Sum of Mulliken charges with hydrogens summed into heavy atoms = 0.00000

Electronic spatial extent (au):  $\langle R^{*2} \rangle = 2066.1953$

Charge= 0.0000 electrons

**2.2.3. 6-Bromo-3-oxo-3,4-dihydropyrazine-2-carboxamide 1c**

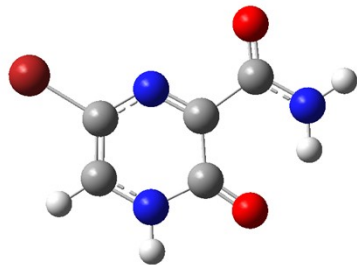

**Optimization:**

Requested convergence on RMS density matrix=1.00D-08 within 128 cycles.

Requested convergence on MAX density matrix=1.00D-06.

Requested convergence on energy=1.00D-06.

No special actions if energy rises.

SCF Done: E(RM062X) = -3081.85249999 A.U. after 8 cycles

Conv = 0.8183D-08 -V/T = 2.0018

1 Symmetry operations used in ECPInt.

ECPInt: NShTT= 10153 NPrTT= 35014 LenC2= 9559 LenP2D= 24293.

LDataN: DoStor=T MaxTD1= 7 Len= 274

Calling FoFJK, ICntrl= 2127 FMM=F ISym2X=0 IICent= 0 IOpCIX= 0 NMat=1 NMatS=1  
NMatT=0.

\*\*\*\*\* Axes restored to original set \*\*\*\*\*

| Center<br>Number | Atomic<br>Number | Forces (Hartrees/Bohr) |              |              |
|------------------|------------------|------------------------|--------------|--------------|
|                  |                  | X                      | Y            | Z            |
| 1                | 6                | -0.000098913           | -0.000027526 | 0.000008207  |
| 2                | 6                | -0.000001167           | 0.000045085  | -0.000001529 |
| 3                | 7                | -0.000005985           | -0.000030878 | 0.000001074  |
| 4                | 6                | 0.000061612            | -0.000017783 | -0.000001427 |
| 5                | 6                | -0.000042535           | 0.000079248  | -0.000000727 |
| 6                | 7                | 0.000088363            | -0.000040146 | -0.000002440 |
| 7                | 1                | 0.000004809            | 0.000008539  | 0.000000384  |
| 8                | 6                | 0.000041564            | -0.000011183 | 0.000000333  |
| 9                | 8                | -0.000009568           | -0.000019216 | 0.000000230  |
| 10               | 7                | -0.000018009           | -0.000004918 | -0.000001868 |
| 11               | 1                | -0.000003771           | -0.000021808 | 0.000000475  |
| 12               | 1                | -0.000013234           | -0.000012685 | 0.000000426  |
| 13               | 8                | 0.000027446            | 0.000006958  | -0.000003423 |
| 14               | 1                | -0.000022517           | 0.000023442  | 0.000000316  |
| 15               | 35               | -0.000008094           | 0.000022870  | -0.000000032 |

Cartesian Forces: Max 0.000098913 RMS 0.000030299

#### Mulliken atomic charges:

1 C 0.327696  
2 C -0.042847  
3 N -0.100637  
4 C 0.071629  
5 C -0.013588  
6 N -0.237031  
7 H 0.188194  
8 C 0.281980  
9 O -0.322274  
10 N -0.490449  
11 H 0.256777  
12 H 0.299144  
13 O -0.422040  
14 H 0.266200  
15 Br -0.062753



Sum of Mulliken atomic charges = 0.00000

Mulliken charges with hydrogens summed into heavy atoms:

1 C 0.327696  
2 C -0.042847  
3 N -0.100637  
4 C 0.071629  
5 C 0.174606  
6 N 0.029168  
8 C 0.281980  
9 O -0.322274  
10 N 0.065472  
13 O -0.422040  
15 Br -0.062753

Sum of Mulliken charges with hydrogens summed into heavy atoms = 0.00000

Electronic spatial extent (au):  $\langle R^{*2} \rangle = 2731.8166$

Charge = 0.0000 electrons

#### 2.2.4. 6-Iodo-3-oxo-3,4-dihydropyrazine-2-carboxamide **1d**

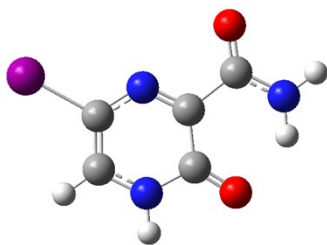

#### Optimization:

SCF Done: E(RM062X) = -805.287656878 A.U. after 9 cycles

Conv = 0.3500D-08 -V/T = 2.3010

1 Symmetry operations used in ECPInt.

ECPInt: NShTT= 10153 NPrTT= 32907 LenC2= 9556 LenP2D= 23357.

LDataN: DoStor=T MaxTD1= 7 Len= 274

Calling FoFJK, ICntrl= 2127 FMM=F ISym2X=0 IICent= 0 IOpClX= 0 NMat=1 NMatS=1  
NMatT=0.

Defaulting to unpruned grid for atomic number 53.

\*\*\*\*\* Axes restored to original set \*\*\*\*\*

| Center<br>Number | Atomic<br>Number | Forces (Hartrees/Bohr) |              |              |
|------------------|------------------|------------------------|--------------|--------------|
|                  |                  | X                      | Y            | Z            |
| 1                | 6                | -0.000153146           | -0.000132413 | -0.000030304 |

|    |    |              |              |              |
|----|----|--------------|--------------|--------------|
| 2  | 6  | -0.000047725 | 0.000104404  | 0.000035921  |
| 3  | 7  | -0.000014674 | -0.000091612 | 0.000000877  |
| 4  | 6  | 0.000133152  | 0.000001350  | -0.000003096 |
| 5  | 6  | -0.000110947 | 0.000122847  | 0.000003667  |
| 6  | 7  | 0.000194370  | -0.000060757 | 0.000006232  |
| 7  | 1  | 0.000011326  | -0.000000078 | -0.000000342 |
| 8  | 6  | 0.000108093  | 0.000022045  | -0.000084272 |
| 9  | 8  | -0.000022091 | -0.000052137 | 0.000035120  |
| 10 | 7  | -0.000096143 | -0.000022396 | 0.000018018  |
| 11 | 1  | -0.000004668 | -0.000037636 | 0.000000460  |
| 12 | 1  | -0.000022037 | -0.000010350 | 0.000006539  |
| 13 | 8  | 0.000084596  | 0.000103308  | 0.000012195  |
| 14 | 1  | -0.000050515 | 0.000038245  | -0.000000374 |
| 15 | 53 | -0.000009592 | 0.000015180  | -0.000000641 |

-----  
Cartesian Forces: Max 0.000194370 RMS 0.000068304

**Mulliken atomic charges:**

1 C 0.329594  
2 C -0.045975  
3 N -0.119363  
4 C 0.074406  
5 C -0.023060  
6 N -0.235649  
7 H 0.191447  
8 C 0.278941  
9 O -0.322954  
10 N -0.491341  
11 H 0.256463  
12 H 0.298982  
13 O -0.421484  
14 H 0.265572  
15 I -0.035579

Sum of Mulliken atomic charges = 0.00000

Mulliken charges with hydrogens summed into heavy atoms:

1 C 0.329594  
2 C -0.045975  
3 N -0.119363  
4 C 0.074406  
5 C 0.168387  
6 N 0.029922  
8 C 0.278941  
9 O -0.322954  
10 N 0.064104  
13 O -0.421484  
15 I -0.035579

Sum of Mulliken charges with hydrogens summed into heavy atoms = 0.00000  
 Electronic spatial extent (au):  $\langle R^{*2} \rangle = 2738.9354$   
 Charge = 0.0000 electrons

### 2.2.5. 3-Oxo-3,4-dihydropyrazine-2-carboxamide **1e**

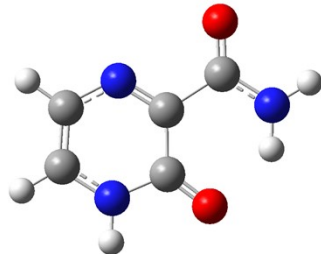

#### Optimization:

Requested convergence on RMS density matrix=1.00D-08 within 128 cycles.

Requested convergence on MAX density matrix=1.00D-06.

Requested convergence on energy=1.00D-06.

No special actions if energy rises.

SCF Done: E(RM062X) = -508.260432843 A.U. after 9 cycles

Conv = 0.8008D-08 -V/T = 2.0043

1 Symmetry operations used in ECPInt.

ECPInt: NShTT= 8515 NPrTT= 26800 LenC2= 8195 LenP2D= 20023.

LDataN: DoStor=T MaxTD1= 7 Len= 274

Calling FoFJK, ICntrl= 2127 FMM=F ISym2X=0 IICent= 0 IOpCIX= 0 NMat=1 NMatS=1  
 NMatT=0.

\*\*\*\*\* Axes restored to original set \*\*\*\*\*

| Center Number | Atomic Number | Forces (Hartrees/Bohr) |              |              |
|---------------|---------------|------------------------|--------------|--------------|
|               |               | X                      | Y            | Z            |
| 1             | 6             | 0.000097958            | -0.000054582 | 0.000050965  |
| 2             | 6             | -0.000054631           | -0.000017865 | -0.000031570 |
| 3             | 7             | -0.000010621           | -0.000006297 | 0.000012403  |
| 4             | 6             | 0.000044856            | -0.000010555 | 0.000009834  |
| 5             | 6             | 0.000030003            | 0.000022680  | -0.000012548 |
| 6             | 7             | -0.000110550           | -0.000011262 | -0.000002087 |
| 7             | 1             | 0.000003053            | -0.000012846 | 0.000000838  |
| 8             | 6             | 0.000010204            | 0.000375716  | -0.000062139 |
| 9             | 8             | 0.000044672            | -0.000190150 | 0.000030781  |
| 10            | 7             | -0.000035266           | -0.000154459 | 0.000020604  |
| 11            | 1             | 0.000008147            | -0.000004123 | -0.000003064 |
| 12            | 1             | -0.000002597           | 0.000005858  | 0.000007596  |
| 13            | 8             | -0.000007554           | 0.000053035  | -0.000018767 |
| 14            | 1             | -0.000028441           | 0.000002198  | -0.000002287 |
| 15            | 1             | 0.000010766            | 0.000002652  | -0.000000559 |

Cartesian Forces: Max 0.000375716 RMS 0.000074567

**Mulliken atomic charges:**

1 C 0.332922  
2 C -0.049734  
3 N -0.110145  
4 C -0.115280  
5 C 0.012596  
6 N -0.245527  
7 H 0.171538  
8 C 0.279689  
9 O -0.328769  
10 N -0.492744  
11 H 0.253896  
12 H 0.297976  
13 O -0.427427  
14 H 0.159518  
15 H 0.261492

Sum of Mulliken atomic charges = 0.00000

Mulliken charges with hydrogens summed into heavy atoms:

1 C 0.332922  
2 C -0.049734  
3 N -0.110145  
4 C 0.044238  
5 C 0.184134  
6 N 0.015964  
8 C 0.279689  
9 O -0.328769  
10 N 0.059127  
13 O -0.427427

Sum of Mulliken charges with hydrogens summed into heavy atoms = 0.00000

Electronic spatial extent (au):  $\langle R^{*2} \rangle = 1309.7913$

Charge= 0.0000 electrons

**2.3. Geometry optimization of excited-state of enol tautomers**

**2.3.1. 6-Fluoro-3-hydroxy-2-pyrazinecarboxamide 1a**

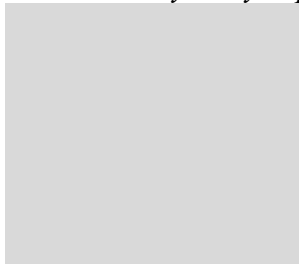

**Optimization:**

Keep R1 ints in memory in canonical form, NReq=151357516.

Requested convergence on RMS density matrix=1.00D-08 within 128 cycles.

Requested convergence on MAX density matrix=1.00D-06.

Requested convergence on energy=1.00D-06.

No special actions if energy rises.

SCF Done: E(RB3LYP) = -607.471351372 A.U. after 8 cycles

NFock= 8 Conv=0.75D-08 -V/T= 2.0088

DoSCS=F DFT=T ScalE2(SS,OS)= 1.000000 1.000000

ExpMin= 1.61D-01 ExpMax= 7.00D+03 ExpMxC= 1.05D+03 IAcc=3 IRadAn= 5

AccDes= 0.00D+00

HarFok: IExCor= 205 AccDes= 0.00D+00 IRadAn= 5 IDoV=-2 UseB2=F ITyADJ=14

ICtDFT= 12500011 ScaDFX= 1.000000 1.000000 1.000000 1.000000

Range of M.O.s used for correlation: 12 185

NBasis= 185 NAE= 40 NBE= 40 NFC= 11 NFV= 0

NROrb= 174 NOA= 29 NOB= 29 NVA= 145 NVB= 145

\*\*\*\*\* Axes restored to original set \*\*\*\*\*

| Center<br>Number | Atomic<br>Number | Forces (Hartrees/Bohr) |              |              |
|------------------|------------------|------------------------|--------------|--------------|
|                  |                  | X                      | Y            | Z            |
| 1                | 6                | 0.000004962            | -0.000006153 | -0.000003665 |
| 2                | 6                | 0.000019368            | 0.000021845  | -0.000000994 |
| 3                | 7                | -0.000016508           | -0.000016214 | 0.000000712  |
| 4                | 6                | 0.000007916            | 0.000009900  | 0.000003486  |
| 5                | 6                | 0.000018010            | -0.000004995 | 0.000010195  |
| 6                | 7                | -0.000005093           | 0.000005336  | -0.000000712 |
| 7                | 1                | 0.000004110            | -0.000013280 | 0.000000781  |
| 8                | 6                | -0.000024241           | -0.000006138 | -0.000013632 |
| 9                | 7                | 0.000003495            | 0.000008191  | 0.000009212  |
| 10               | 1                | 0.000000083            | 0.000000224  | -0.000002742 |
| 11               | 1                | -0.000001148           | -0.000001182 | 0.000003933  |
| 12               | 8                | -0.000001594           | -0.000009445 | 0.000001007  |
| 13               | 8                | -0.000006185           | 0.000019652  | -0.000009282 |
| 14               | 1                | -0.000001958           | -0.000009357 | 0.000000243  |
| 15               | 9                | -0.000001217           | 0.000001616  | 0.000001458  |

Cartesian Forces: Max 0.000024241 RMS 0.000009478

**Mulliken atomic charges:**

1 C 0.041748  
2 C 0.518419  
3 N -0.440224  
4 C 0.205995  
5 C 0.530264  
6 N -0.477308  
7 H 0.143028  
8 C 0.551726  
9 N -0.621788

10 H 0.289949  
11 H 0.287558  
12 O -0.542082  
13 O -0.557349  
14 H 0.338907  
15 F -0.268842

Sum of Mulliken charges = 0.00000

Mulliken charges with hydrogens summed into heavy atoms:

1 C 0.184776  
2 C 0.518419  
3 N -0.440224  
4 C 0.205995  
5 C 0.530264  
6 N -0.477308  
8 C 0.551726  
9 N -0.044281  
12 O -0.542082  
13 O -0.218442  
15 F -0.268842

### 2.3.2. 6-Chloro-3-hydroxy-2-pyrazinecarboxamide **1b**

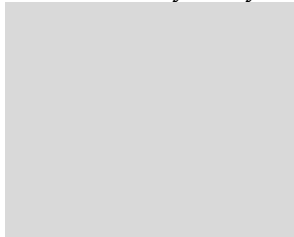

#### Optimization:

Requested convergence on RMS density matrix=1.00D-08 within 128 cycles.

Requested convergence on MAX density matrix=1.00D-06.

Requested convergence on energy=1.00D-06.

No special actions if energy rises.

SCF Done: E(RB3LYP) = -967.830318312 A.U. after 8 cycles

NFock= 8 Conv=0.97D-08 -V/T= 2.0063

DoSCS=F DFT=T ScalE2(SS,OS)= 1.000000 1.000000

ExpMin= 1.43D-01 ExpMax= 2.52D+04 ExpMxC= 3.78D+03 IAcc=3 IRadAn= 5

AccDes= 0.00D+00

HarFok: IExCor= 205 AccDes= 0.00D+00 IRadAn= 5 IDoV=-2 UseB2=F ITyADJ=14

ICtDFT= 12500011 ScaDFX= 1.000000 1.000000 1.000000 1.000000

Range of M.O.s used for correlation: 16 189

NBasis= 189 NAE= 44 NBE= 44 NFC= 15 NFV= 0

NROrb= 174 NOA= 29 NOB= 29 NVA= 145 NVB= 145

Keep R1, R2, and R3 ints in memory in canonical form, NReq=524366177.

\*\*\*\*\* Axes restored to original set \*\*\*\*\*

-----  
Center Atomic Forces (Hartrees/Bohr)

| Number | Number | X            | Y            | Z            |
|--------|--------|--------------|--------------|--------------|
| 1      | 6      | -0.000026171 | 0.000054286  | -0.000000221 |
| 2      | 6      | -0.000004003 | -0.000067811 | -0.000001875 |
| 3      | 7      | 0.000030698  | 0.000018881  | -0.000008025 |
| 4      | 6      | -0.000012131 | -0.000021531 | -0.000027406 |
| 5      | 6      | -0.000026003 | 0.000024439  | -0.000014513 |
| 6      | 7      | 0.000042945  | -0.000032659 | 0.000006054  |
| 7      | 1      | 0.000005297  | -0.000013109 | -0.000000627 |
| 8      | 6      | 0.000000814  | 0.000027051  | 0.000130563  |
| 9      | 7      | 0.000001945  | -0.000004634 | -0.000041245 |
| 10     | 1      | -0.000007698 | 0.000014667  | -0.000003789 |
| 11     | 1      | -0.000000482 | 0.000003166  | -0.000003087 |
| 12     | 8      | -0.000015346 | 0.000000772  | -0.000040645 |
| 13     | 8      | 0.000012421  | -0.000019460 | 0.000002747  |
| 14     | 1      | 0.000009028  | 0.000017325  | 0.000001278  |
| 15     | 17     | -0.000011314 | -0.000001384 | 0.000000791  |

Cartesian Forces: Max 0.000130563 RMS 0.000029198

**Mulliken atomic charges:**

1 C 0.113406  
 2 C 0.102149  
 3 N -0.395394  
 4 C 0.204513  
 5 C 0.533408  
 6 N -0.477929  
 7 H 0.147306  
 8 C 0.553367  
 9 N -0.621820  
 10 H 0.290803  
 11 H 0.287084  
 12 O -0.540129  
 13 O -0.553569  
 14 H 0.339586  
 15 Cl 0.017220

Sum of Mulliken charges = 0.00000

Mulliken charges with hydrogens summed into heavy atoms:

1 C 0.260713  
 2 C 0.102149  
 3 N -0.395394  
 4 C 0.204513  
 5 C 0.533408  
 6 N -0.477929  
 8 C 0.553367  
 9 N -0.043934

12 O -0.540129  
 13 O -0.213984  
 15 Cl 0.017220  
 Electronic spatial extent (au):  $\langle R^2 \rangle =$  2087.5049  
 Charge= 0.0000 electrons

### 2.3.3. 6-Bromo-3-hydroxy-2-pyrazinecarboxamide **1c**

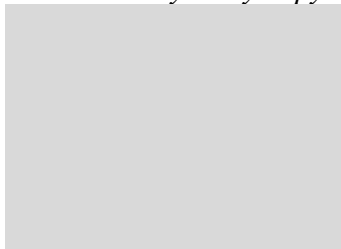

#### Optimization:

Requested convergence on RMS density matrix=1.00D-08 within 128 cycles.  
 Requested convergence on MAX density matrix=1.00D-06.  
 Requested convergence on energy=1.00D-06.  
 No special actions if energy rises.  
 SCF Done: E(RB3LYP) = -3079.33847134 A.U. after 9 cycles  
 NFock= 9 Conv=0.47D-08 -V/T= 2.0066  
 DoSCS=F DFT=T ScalE2(SS,OS)= 1.000000 1.000000  
 ExpMin= 1.43D-01 ExpMax= 5.74D+05 ExpMxC= 5.74D+03 IAcc=3 IRadAn= 5  
 AccDes= 0.00D+00  
 HarFok: IExCor= 205 AccDes= 0.00D+00 IRadAn= 5 IDoV=-2 UseB2=F ITyADJ=14  
 ICtDFT= 12500011 ScaDFX= 1.000000 1.000000 1.000000 1.000000  
 Range of M.O.s used for correlation: 25 200  
 NBasis= 200 NAE= 53 NBE= 53 NFC= 24 NFV= 0  
 NROrb= 176 NOA= 29 NOB= 29 NVA= 147 NVB= 147  
 \*\*\*\*\* Axes restored to original set \*\*\*\*\*

| Center<br>Number | Atomic<br>Number | Forces (Hartrees/Bohr) |              |              |
|------------------|------------------|------------------------|--------------|--------------|
|                  |                  | X                      | Y            | Z            |
| 1                | 6                | -0.000002263           | 0.000022392  | -0.000005153 |
| 2                | 6                | 0.000004733            | -0.000000595 | -0.000006191 |
| 3                | 7                | -0.000005395           | 0.000003477  | -0.000000446 |
| 4                | 6                | 0.000000771            | -0.000000503 | -0.000004506 |
| 5                | 6                | 0.000012369            | 0.000008023  | 0.000017665  |
| 6                | 7                | -0.000003211           | -0.000002421 | -0.000000718 |
| 7                | 1                | 0.000002326            | -0.000005363 | 0.000001128  |
| 8                | 6                | -0.000010779           | -0.000021868 | 0.000003810  |
| 9                | 7                | -0.000000544           | 0.000010997  | 0.000002391  |
| 10               | 1                | 0.000005608            | -0.000006438 | -0.000004888 |
| 11               | 1                | 0.000000732            | -0.000008522 | 0.000000719  |
| 12               | 8                | 0.000003746            | -0.000008929 | -0.000000096 |
| 13               | 8                | -0.000008028           | 0.000015795  | -0.000005225 |



|    |    |              |              |              |
|----|----|--------------|--------------|--------------|
| 14 | 1  | -0.000004055 | -0.000013369 | -0.000001808 |
| 15 | 35 | 0.000003991  | 0.000007325  | 0.000003318  |

-----  
Cartesian Forces: Max 0.000022392 RMS 0.000007970

**Mulliken atomic charges:**

|       |           |
|-------|-----------|
| 1 C   | 0.103253  |
| 2 C   | 0.240136  |
| 3 N   | -0.422103 |
| 4 C   | 0.206243  |
| 5 C   | 0.532990  |
| 6 N   | -0.479897 |
| 7 H   | 0.146828  |
| 8 C   | 0.551809  |
| 9 N   | -0.621931 |
| 10 H  | 0.290672  |
| 11 H  | 0.286787  |
| 12 O  | -0.540314 |
| 13 O  | -0.553426 |
| 14 H  | 0.339485  |
| 15 Br | -0.080532 |

Sum of Mulliken charges = 0.00000

Mulliken charges with hydrogens summed into heavy atoms

|       |           |
|-------|-----------|
| 1 C   | 0.250081  |
| 2 C   | 0.240136  |
| 3 N   | -0.422103 |
| 4 C   | 0.206243  |
| 5 C   | 0.532990  |
| 6 N   | -0.479897 |
| 8 C   | 0.551809  |
| 9 N   | -0.044472 |
| 12 O  | -0.540314 |
| 13 O  | -0.213941 |
| 15 Br | -0.080532 |

Electronic spatial extent (au):  $\langle R^2 \rangle = 2769.1645$

Charge = 0.0000 electrons

2.3.4. *6-Iodo-3-hydroxy-2-pyrazinecarboxamide 1d*

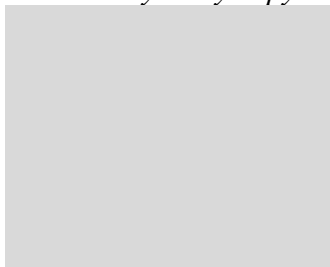

**Optimization:**

Requested convergence on RMS density matrix=1.00D-08 within 128 cycles.

Requested convergence on MAX density matrix=1.00D-06.  
 Requested convergence on energy=1.00D-06.  
 No special actions if energy rises.  
 Defaulting to unpruned grid for atomic number 53.  
 SCF Done: E(RB3LYP) = -519.001715230 A.U. after 9 cycles  
 NFock= 9 Conv=0.57D-08 -V/T= 2.0232  
 DoSCS=F DFT=T ScalE2(SS,OS)= 1.000000 1.000000  
 ExpMin= 1.05D-01 ExpMax= 5.48D+03 ExpMxC= 8.25D+02 IAcc=3 IRadAn= 5  
 AccDes= 0.00D+00  
 HarFok: IExCor= 205 AccDes= 0.00D+00 IRadAn= 5 IDoV=-2 UseB2=F ITyADJ=14  
 ICtDFT= 12500011 ScaDFX= 1.000000 1.000000 1.000000 1.000000  
 \*\*\*\*\* Axes restored to original set \*\*\*\*\*

| Center<br>Number | Atomic<br>Number | Forces (Hartrees/Bohr) |              |              |
|------------------|------------------|------------------------|--------------|--------------|
|                  |                  | X                      | Y            | Z            |
| 1                | 6                | -0.000047202           | 0.000031792  | -0.000000384 |
| 2                | 6                | 0.000001962            | -0.000003795 | -0.000000254 |
| 3                | 7                | 0.000029786            | -0.000009233 | 0.000000457  |
| 4                | 6                | -0.000024889           | 0.000014686  | 0.000000042  |
| 5                | 6                | -0.000020925           | -0.000011809 | 0.000001340  |
| 6                | 7                | 0.000046036            | 0.000002251  | 0.000000040  |
| 7                | 1                | -0.000000384           | 0.000001614  | -0.000000146 |
| 8                | 6                | 0.000010763            | -0.000001583 | 0.000001709  |
| 9                | 7                | 0.000003080            | -0.000008181 | -0.000011735 |
| 10               | 1                | 0.000002269            | -0.000002306 | 0.000005052  |
| 11               | 1                | -0.000000764           | -0.000009259 | 0.000004261  |
| 12               | 8                | -0.000000353           | -0.000002266 | -0.000000070 |
| 13               | 8                | 0.000005111            | -0.000016817 | -0.000000766 |
| 14               | 1                | -0.000006300           | 0.000007881  | 0.000000231  |
| 15               | 53               | 0.000001807            | 0.000007026  | 0.000000224  |

-----  
Cartesian Forces: Max 0.000047202 RMS 0.000013918

**Mulliken atomic charges:**

1 C 0.140350  
2 C -0.173741  
3 N -0.261778  
4 C 0.141121  
5 C 0.461378  
6 N -0.394745  
7 H 0.143580  
8 C 0.491045  
9 N -0.583976  
10 H 0.290287  
11 H 0.284111  
12 O -0.503331  
13 O -0.527520  
14 H 0.339539  
15 I 0.153679

Sum of Mulliken charges = 0.00000

Mulliken charges with hydrogens summed into heavy atoms:

1 C 0.283930  
2 C -0.173741  
3 N -0.261778  
4 C 0.141121  
5 C 0.461378  
6 N -0.394745  
8 C 0.491045  
9 N -0.009577  
12 O -0.503331  
13 O -0.187981  
15 I 0.153679

Electronic spatial extent (au):  $\langle R^2 \rangle = 2371.7718$

Charge = 0.0000 electrons

2.3.5. *3-Hydroxy-2-pyrazinecarboxamide 1e*

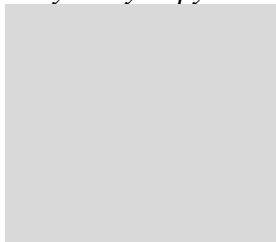

**Optimization:**

Requested convergence on RMS density matrix=1.00D-08 within 128 cycles.

Requested convergence on MAX density matrix=1.00D-06.  
 Requested convergence on energy=1.00D-06.  
 No special actions if energy rises.  
 SCF Done: E(RB3LYP) = -508.236371772 A.U. after 8 cycles  
 NFock= 8 Conv=0.88D-08 -V/T= 2.0093  
 DoSCS=F DFT=T ScalE2(SS,OS)= 1.000000 1.000000  
 ExpMin= 1.61D-01 ExpMax= 5.48D+03 ExpMxC= 8.25D+02 IAcc=3 IRadAn= 5  
 AccDes= 0.00D+00  
 HarFok: IExCor= 205 AccDes= 0.00D+00 IRadAn= 5 IDoV=-2 UseB2=F  
 ITyADJ=14  
 ICtDFT= 12500011 ScaDFX= 1.000000 1.000000 1.000000 1.000000  
 Range of M.O.s used for correlation: 11 175  
 NBasis= 175 NAE= 36 NBE= 36 NFC= 10 NFV= 0  
 NROrb= 165 NOA= 26 NOB= 26 NVA= 139 NVB= 139  
 Keep R1, R2, and R3 ints in memory in canonical form, NReq=392782533.

\*\*\*\*\* Axes restored to original set \*\*\*\*\*

| Center<br>Number | Atomic<br>Number | Forces (Hartrees/Bohr) |              |              |
|------------------|------------------|------------------------|--------------|--------------|
|                  |                  | X                      | Y            | Z            |
| 1                | 6                | 0.000004779            | -0.000035158 | -0.000000915 |
| 2                | 6                | -0.000015173           | 0.000012492  | 0.000000473  |
| 3                | 7                | 0.000026334            | -0.000027931 | -0.000001647 |
| 4                | 6                | -0.000022818           | 0.000030199  | -0.000028705 |
| 5                | 6                | -0.000000056           | -0.000021461 | -0.000029924 |
| 6                | 7                | 0.000021013            | 0.000030221  | 0.000010193  |
| 7                | 1                | -0.000000933           | 0.000001595  | -0.000000978 |
| 8                | 1                | 0.000009401            | -0.000000777 | 0.000000766  |
| 9                | 6                | 0.000032855            | -0.000012884 | 0.000154559  |
| 10               | 7                | -0.000011247           | 0.000021966  | -0.000044775 |
| 11               | 1                | 0.000001871            | -0.000000981 | -0.000002529 |
| 12               | 1                | 0.000000175            | 0.000003500  | 0.000003502  |
| 13               | 8                | -0.000030048           | -0.000014779 | -0.000060081 |
| 14               | 8                | -0.000019190           | 0.000011882  | -0.000000558 |
| 15               | 1                | 0.000003037            | 0.000002117  | 0.000000617  |

Cartesian Forces: Max 0.000154559 RMS 0.000030304

**Mulliken atomic charges:**

1 C 0.085243  
 2 C 0.095379  
 3 N -0.405078  
 4 C 0.203672  
 5 C 0.531999  
 6 N -0.486188  
 7 H 0.125550

8 H 0.117944  
 9 C 0.550699  
 10 N -0.622885  
 11 H 0.287309  
 12 H 0.284868  
 13 O -0.547607  
 14 O -0.556238  
 15 H 0.335332  
 Sum of Mulliken charges = 0.00000  
 Mulliken charges with hydrogens summed into heavy atoms  
 1 C 0.210793  
 2 C 0.213323  
 3 N -0.405078  
 4 C 0.203672  
 5 C 0.531999  
 6 N -0.486188  
 9 C 0.550699  
 10 N -0.050708  
 13 O -0.547607  
 14 O -0.220905  
 Electronic spatial extent (au):  $\langle R^2 \rangle =$  1303.0307  
 Charge= 0.0000 electrons

## 2.4. Geometry optimization of ground-state of keto tautomers

### 2.4.1. 6-Fluoro-3-oxo-3,4-dihydropyrazine-2-carboxamide **1a**

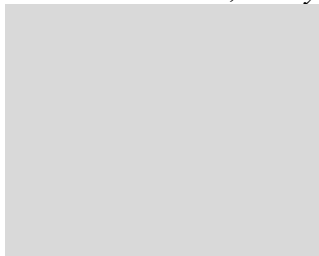

#### Optimization:

Requested convergence on RMS density matrix=1.00D-08 within 128 cycles.  
 Requested convergence on MAX density matrix=1.00D-06.  
 Requested convergence on energy=1.00D-06.  
 No special actions if energy rises.  
 SCF Done: E(RB3LYP) = -607.468369319 A.U. after 10 cycles  
 NFock= 10 Conv=0.90D-08 -V/T= 2.0088  
 DoSCS=F DFT=T ScalE2(SS,OS)= 1.000000 1.000000  
 ExpMin= 1.61D-01 ExpMax= 7.00D+03 ExpMxC= 1.05D+03 IAcc=3 IRadAn= 5  
 AccDes= 0.00D+00  
 HarFok: IExCor= 205 AccDes= 0.00D+00 IRadAn= 5 IDoV=-2 UseB2=F ITyADJ=14  
 ICtDFT= 12500011 ScaDFX= 1.000000 1.000000 1.000000 1.000000  
 Range of M.O.s used for correlation: 12 185

NBasis= 185 NAE= 40 NBE= 40 NFC= 11 NFV= 0  
 NROrb= 174 NOA= 29 NOB= 29 NVA= 145 NVB= 145  
 \*\*\*\*\* Axes restored to original set \*\*\*\*\*

| Center<br>Number | Atomic<br>Number | Forces (Hartrees/Bohr) |              |              |
|------------------|------------------|------------------------|--------------|--------------|
|                  |                  | X                      | Y            | Z            |
| 1                | 6                | -0.000372668           | -0.000136865 | 0.000003928  |
| 2                | 6                | -0.000055793           | 0.000028959  | -0.000005915 |
| 3                | 7                | 0.000129036            | 0.000066629  | -0.000005916 |
| 4                | 6                | -0.000079057           | -0.000157122 | -0.000026059 |
| 5                | 6                | -0.000230202           | -0.000608919 | -0.000085089 |
| 6                | 7                | 0.000219886            | 0.000089004  | 0.000020451  |
| 7                | 1                | 0.000035101            | 0.000051277  | -0.000001775 |
| 8                | 6                | 0.000491834            | -0.000353110 | 0.000212442  |
| 9                | 7                | -0.000076120           | -0.000561173 | -0.000069970 |
| 10               | 1                | 0.000025200            | -0.000098806 | -0.000007245 |
| 11               | 1                | -0.000316287           | 0.000443919  | 0.000017047  |
| 12               | 8                | -0.000268862           | 0.000792400  | -0.000076652 |
| 13               | 8                | 0.000325357            | 0.000353048  | 0.000016570  |
| 14               | 1                | -0.000001724           | 0.000034511  | 0.000004712  |
| 15               | 9                | 0.000174300            | 0.000056249  | 0.000003470  |

Cartesian Forces: Max 0.000792400 RMS 0.000245977

**Mulliken atomic charges:**

1 C 0.084301  
 2 C 0.506019  
 3 N -0.428719  
 4 C 0.153911  
 5 C 0.616810  
 6 N -0.526802  
 7 H 0.163618  
 8 C 0.560167  
 9 N -0.626698  
 10 H 0.277917  
 11 H 0.321676  
 12 O -0.555984  
 13 O -0.578407  
 14 H 0.301714  
 15 F -0.269523

Sum of Mulliken charges = 0.00000

Mulliken charges with hydrogens summed into heavy atoms:

1 C 0.247919  
 2 C 0.506019  
 3 N -0.428719

4 C 0.153911  
 5 C 0.616810  
 6 N -0.225088  
 8 C 0.560167  
 9 N -0.027106  
 12 O -0.555984  
 13 O -0.578407  
 15 F -0.269523

Electronic spatial extent (au):  $\langle R^{*2} \rangle =$  1639.5702  
 Charge= 0.0000 electrons

### 2.2.2. 6-Chloro-3-oxo-3,4-dihydropyrazine-2-carboxamide **1b**

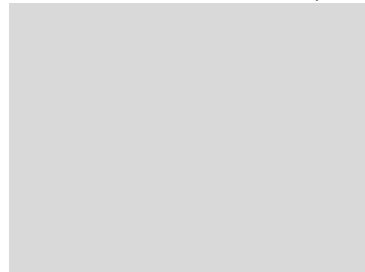

#### Optimization:

Requested convergence on RMS density matrix=1.00D-08 within 128 cycles.

Requested convergence on MAX density matrix=1.00D-06.

Requested convergence on energy=1.00D-06.

No special actions if energy rises.

SCF Done: E(RB3LYP) = -967.828856262 A.U. after 9 cycles

NFock= 9 Conv=0.86D-08 -V/T= 2.0063

DoSCS=F DFT=T ScalE2(SS,OS)= 1.000000 1.000000

ExpMin= 1.43D-01 ExpMax= 2.52D+04 ExpMxC= 3.78D+03 IAcc=3 IRadAn= 5

AccDes= 0.00D+00

HarFok: IExCor= 205 AccDes= 0.00D+00 IRadAn= 5 IDoV=-2 UseB2=F ITyADJ=14

ICtDFT= 12500011 ScaDFX= 1.000000 1.000000 1.000000 1.000000

Range of M.O.s used for correlation: 16 189

NBasis= 189 NAE= 44 NBE= 44 NFC= 15 NFV= 0

NROrb= 174 NOA= 29 NOB= 29 NVA= 145 NVB= 145

Keep R1, R2, and R3 ints in memory in canonical form, NReq=563693793.

\*\*\*\*\* Axes restored to original set \*\*\*\*\*

| Center<br>Number | Atomic<br>Number | Forces (Hartrees/Bohr) |              |              |
|------------------|------------------|------------------------|--------------|--------------|
|                  |                  | X                      | Y            | Z            |
| 1                | 6                | -0.000044966           | -0.000057398 | -0.000002944 |
| 2                | 6                | -0.000023931           | 0.000002132  | 0.000003518  |
| 3                | 7                | 0.000063526            | 0.000029148  | -0.000009688 |
| 4                | 6                | -0.000077145           | -0.000010653 | -0.000035933 |
| 5                | 6                | -0.000033983           | 0.000010524  | 0.000025486  |
| 6                | 7                | 0.000059990            | 0.000027604  | -0.000007906 |

|    |    |              |              |              |
|----|----|--------------|--------------|--------------|
| 7  | 1  | 0.000007252  | 0.000008657  | -0.000000821 |
| 8  | 6  | 0.000038741  | 0.000087056  | 0.000118843  |
| 9  | 7  | -0.000007024 | -0.000029904 | -0.000038813 |
| 10 | 1  | 0.000007451  | 0.000013288  | -0.000004416 |
| 11 | 1  | -0.000002341 | 0.000015650  | 0.000003288  |
| 12 | 8  | -0.000002049 | -0.000093764 | -0.000039180 |
| 13 | 8  | 0.000020115  | 0.000001357  | -0.000014563 |
| 14 | 1  | -0.000011732 | -0.000006580 | 0.000002639  |
| 15 | 17 | 0.000006094  | 0.000002884  | 0.000000490  |

-----  
 Cartesian Forces: Max 0.000118843 RMS 0.000037138

**Mulliken atomic charges:**

|       |           |
|-------|-----------|
| 1 C   | 0.161915  |
| 2 C   | 0.077647  |
| 3 N   | -0.387386 |
| 4 C   | 0.152744  |
| 5 C   | 0.617226  |
| 6 N   | -0.526737 |
| 7 H   | 0.167877  |
| 8 C   | 0.561467  |
| 9 N   | -0.625155 |
| 10 H  | 0.279281  |
| 11 H  | 0.318130  |
| 12 O  | -0.553911 |
| 13 O  | -0.571355 |
| 14 H  | 0.301602  |
| 15 Cl | 0.026653  |

Sum of Mulliken charges = 0.00000

Mulliken charges with hydrogens summed into heavy atoms:

|       |           |
|-------|-----------|
| 1 C   | 0.329792  |
| 2 C   | 0.077647  |
| 3 N   | -0.387386 |
| 4 C   | 0.152744  |
| 5 C   | 0.617226  |
| 6 N   | -0.225135 |
| 8 C   | 0.561467  |
| 9 N   | -0.027744 |
| 12 O  | -0.553911 |
| 13 O  | -0.571355 |
| 15 Cl | 0.026653  |

Electronic spatial extent (au):  $\langle R^{*2} \rangle =$  2081.5291

Charge= 0.0000 electrons



### 2.2.3. 6-Bromo-3-oxo-3,4-dihydropyrazine-2-carboxamide **1c**

#### Optimization:

Requested convergence on RMS density matrix=1.00D-08 within 128 cycles.

Requested convergence on MAX density matrix=1.00D-06.

Requested convergence on energy=1.00D-06.

No special actions if energy rises.

SCF Done: E(RB3LYP) = -3079.33724029 A.U. after 8 cycles

NFock= 8 Conv=0.94D-08 -V/T= 2.0066

DoSCS=F DFT=T ScalE2(SS,OS)= 1.000000 1.000000

ExpMin= 1.43D-01 ExpMax= 5.74D+05 ExpMxC= 5.74D+03 IAcc=3 IRadAn= 5

AccDes= 0.00D+00

HarFok: IExCor= 205 AccDes= 0.00D+00 IRadAn= 5 IDoV=-2 UseB2=F ITyADJ=14

ICtDFT= 12500011 ScaDFX= 1.000000 1.000000 1.000000 1.000000

Range of M.O.s used for correlation: 25 200

NBasis= 200 NAE= 53 NBE= 53 NFC= 24 NFV= 0

NROrb= 176 NOA= 29 NOB= 29 NVA= 147 NVB= 147

\*\*\*\*\* Axes restored to original set \*\*\*\*\*

| Center<br>Number | Atomic<br>Number | Forces (Hartrees/Bohr) |              |              |
|------------------|------------------|------------------------|--------------|--------------|
|                  |                  | X                      | Y            | Z            |
| 1                | 6                | -0.000065943           | -0.000051460 | -0.000008097 |
| 2                | 6                | 0.000031688            | 0.000007785  | 0.000010664  |
| 3                | 7                | 0.000075554            | 0.000034152  | -0.000011742 |
| 4                | 6                | -0.000062277           | -0.000005449 | -0.000042169 |
| 5                | 6                | -0.000085875           | -0.000009209 | 0.000105380  |
| 6                | 7                | 0.000063212            | 0.000023539  | -0.000027029 |
| 7                | 1                | 0.000013531            | 0.000008229  | -0.000000499 |
| 8                | 6                | 0.000025947            | 0.000089027  | 0.000046864  |
| 9                | 7                | -0.000006397           | -0.000056159 | -0.000016515 |
| 10               | 1                | 0.000004883            | 0.000009683  | -0.000002517 |
| 11               | 1                | -0.000001604           | 0.000046404  | -0.000000346 |
| 12               | 8                | -0.000012278           | -0.000095842 | -0.000012340 |
| 13               | 8                | 0.000047730            | 0.000006360  | -0.000041443 |
| 14               | 1                | -0.000011413           | -0.000002682 | 0.000000899  |
| 15               | 35               | -0.000016756           | -0.000004378 | -0.000001110 |

Cartesian Forces: Max 0.000105380 RMS 0.000040972

**Mulliken atomic charges:**

1 C 0.151749  
2 C 0.216707  
3 N -0.413738  
4 C 0.153464  
5 C 0.616946  
6 N -0.529002  
7 H 0.166962  
8 C 0.560033  
9 N -0.625219  
10 H 0.279079  
11 H 0.317814  
12 O -0.554301  
13 O -0.571240  
14 H 0.301094  
15 Br -0.070346

Sum of Mulliken charges = 0.00000

Mulliken charges with hydrogens summed into heavy atoms:

1 C 0.318711  
2 C 0.216707  
3 N -0.413738  
4 C 0.153464  
5 C 0.616946  
6 N -0.227909  
8 C 0.560033  
9 N -0.028326  
12 O -0.554301  
13 O -0.571240  
15 Br -0.070346

Electronic spatial extent (au):  $\langle R^{*2} \rangle = 2764.1986$

Charge = 0.0000 electrons

**2.2.4. 6-Iodo-3-oxo-3,4-dihydropyrazine-2-carboxamide 1d**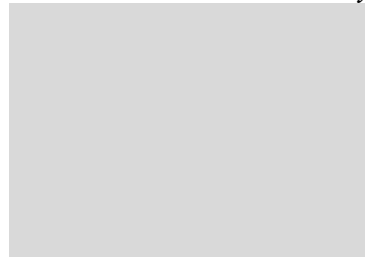**Optimization:**

Requested convergence on RMS density matrix=1.00D-08 within 128 cycles.

Requested convergence on MAX density matrix=1.00D-06.

Requested convergence on energy=1.00D-06.

No special actions if energy rises.

Defaulting to unpruned grid for atomic number 53.

Defaulting to unpruned grid for atomic number 53.

Defaulting to unpruned grid for atomic number 53.  
 Defaulting to unpruned grid for atomic number 53.  
 Defaulting to unpruned grid for atomic number 53.  
 Defaulting to unpruned grid for atomic number 53.  
 Defaulting to unpruned grid for atomic number 53.  
 Defaulting to unpruned grid for atomic number 53.  
 Defaulting to unpruned grid for atomic number 53.  
 Defaulting to unpruned grid for atomic number 53.  
 Defaulting to unpruned grid for atomic number 53.  
 Defaulting to unpruned grid for atomic number 53.  
 Defaulting to unpruned grid for atomic number 53.  
 Defaulting to unpruned grid for atomic number 53.  
 Defaulting to unpruned grid for atomic number 53.  
 Defaulting to unpruned grid for atomic number 53.  
 SCF Done: E(RB3LYP) = -519.000481027 A.U. after 10 cycles  
           NFock= 10 Conv=0.59D-08 -V/T= 2.0231  
 DoSCS=F DFT=T Scale2(SS,OS)= 1.000000 1.000000  
 ExpMin= 1.05D-01 ExpMax= 5.48D+03 ExpMxC= 8.25D+02 IAcc=3 IRadAn= 5  
 AccDes= 0.00D+00  
 HarFok: IExCor= 205 AccDes= 0.00D+00 IRadAn= 5 IDoV=-2 UseB2=F ITyADJ=14  
 ICtDFT= 12500011 ScaDFX= 1.000000 1.000000 1.000000 1.000000  
 Range of M.O.s used for correlation: 11 168  
 NBasis= 168 NAE= 39 NBE= 39 NFC= 10 NFV= 0  
 NROrb= 158 NOA= 29 NOB= 29 NVA= 129 NVB= 129  
 Keep R1, R2, and R3 ints in memory in canonical form, NReq=340119789.  
 \*\*\*\*\* Axes restored to original set \*\*\*\*\*

| Center<br>Number | Atomic<br>Number | Forces (Hartrees/Bohr) |              |              |
|------------------|------------------|------------------------|--------------|--------------|
|                  |                  | X                      | Y            | Z            |
| 1                | 6                | 0.000057794            | -0.000030720 | -0.000013102 |
| 2                | 6                | -0.000050063           | 0.000011586  | 0.000014547  |
| 3                | 7                | -0.000094036           | 0.000040028  | -0.000018674 |
| 4                | 6                | 0.000070286            | -0.000008674 | -0.000079282 |
| 5                | 6                | 0.000081186            | -0.000006618 | 0.000176569  |
| 6                | 7                | -0.000056878           | 0.000022345  | -0.000044745 |
| 7                | 1                | -0.000025002           | 0.000018541  | -0.000001249 |
| 8                | 6                | -0.000015302           | 0.000140151  | 0.000112465  |
| 9                | 7                | 0.000015476            | -0.000055364 | -0.000041177 |
| 10               | 1                | 0.000001302            | 0.000001373  | -0.000004929 |
| 11               | 1                | 0.000000351            | 0.000027912  | 0.000007915  |
| 12               | 8                | 0.000035838            | -0.000152703 | -0.000034378 |
| 13               | 8                | -0.000045169           | -0.000018465 | -0.000076700 |
| 14               | 1                | 0.000003392            | 0.000002330  | 0.000002838  |
| 15               | 53               | 0.000020826            | 0.000008281  | -0.000000097 |

Cartesian Forces: Max 0.000176569 RMS 0.000057134

**Mulliken atomic charges:**

1 C 0.196340  
2 C -0.204996  
3 N -0.255363  
4 C 0.089253  
5 C 0.538909  
6 N -0.473345  
7 H 0.162751  
8 C 0.492925  
9 N -0.587486  
10 H 0.279015  
11 H 0.312953  
12 O -0.512679  
13 O -0.518292  
14 H 0.302229  
15 I 0.177785

Sum of Mulliken charges = 0.00000

Mulliken charges with hydrogens summed into heavy atoms

1 C 0.359091  
2 C -0.204996  
3 N -0.255363  
4 C 0.089253  
5 C 0.538909  
6 N -0.171116  
8 C 0.492925  
9 N 0.004482  
12 O -0.512679  
13 O -0.518292  
15 I 0.177785

Electronic spatial extent (au):  $\langle R^2 \rangle = 2368.8532$

Charge= 0.0000 electrons

**2.2.5. 3-Oxo-3,4-dihydropyrazine-2-carboxamide 1e**

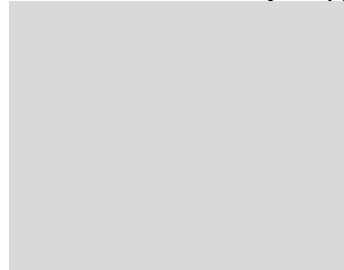

**Optimization:**

Requested convergence on RMS density matrix=1.00D-08 within 128 cycles.

Requested convergence on MAX density matrix=1.00D-06.

Requested convergence on energy=1.00D-06.

No special actions if energy rises.

SCF Done: E(RB3LYP) = -508.238379402 A.U. after 9 cycles

NFock= 9 Conv=0.76D-08 -V/T= 2.0093

DoSCS=F DFT=T ScalE2(SS,OS)= 1.000000 1.000000

ExpMin= 1.61D-01 ExpMax= 5.48D+03 ExpMxC= 8.25D+02 IAcc=3 IRadAn= 5

AccDes= 0.00D+00

HarFok: IExCor= 205 AccDes= 0.00D+00 IRadAn= 5 IDoV=-2 UseB2=F ITyADJ=14

ICtDFT= 12500011 ScaDFX= 1.000000 1.000000 1.000000 1.000000

Range of M.O.s used for correlation: 11 175

NBasis= 175 NAE= 36 NBE= 36 NFC= 10 NFV= 0

NROrb= 165 NOA= 26 NOB= 26 NVA= 139 NVB= 139

Keep R1, R2, and R3 ints in memory in canonical form, NReq=428567813.

\*\*\*\*\* Axes restored to original set \*\*\*\*\*

---

| Center<br>Number | Atomic<br>Number | Forces (Hartrees/Bohr) |              |              |
|------------------|------------------|------------------------|--------------|--------------|
|                  |                  | X                      | Y            | Z            |
| 1                | 6                | 0.000045188            | -0.000063054 | 0.000008556  |
| 2                | 6                | -0.000043594           | -0.000006747 | -0.000006934 |
| 3                | 7                | 0.000014411            | 0.000058417  | 0.000005149  |
| 4                | 6                | 0.000034586            | -0.000024525 | 0.000013911  |
| 5                | 6                | 0.000017788            | -0.000030880 | -0.000129685 |
| 6                | 7                | -0.000021362           | 0.000047088  | 0.000030706  |
| 7                | 1                | -0.000003949           | 0.000026837  | -0.000000202 |
| 8                | 1                | 0.000018090            | 0.000002849  | 0.000000113  |
| 9                | 6                | 0.000022085            | 0.000055588  | 0.000086770  |
| 10               | 7                | -0.000021132           | -0.000020632 | -0.000025008 |
| 11               | 1                | -0.000000103           | -0.000006829 | -0.000001679 |
| 12               | 1                | 0.000020629            | 0.000035428  | -0.000000016 |
| 13               | 8                | -0.000054404           | -0.000092595 | -0.000032411 |
| 14               | 8                | -0.000026187           | 0.000016049  | 0.000050081  |
| 15               | 1                | -0.000002046           | 0.000003006  | 0.000000648  |

---

Cartesian Forces: Max 0.000129685 RMS 0.000038552

**Mulliken atomic charges:**

1 C 0.133452  
2 C 0.073046  
3 N -0.400728  
4 C 0.155373  
5 C 0.612172  
6 N -0.527178  
7 H 0.147579  
8 H 0.125672  
9 C 0.558798  
10 N -0.626562

11 H 0.275268  
12 H 0.316873  
13 O -0.562070  
14 O -0.576570  
15 H 0.294875

Sum of Mulliken charges = 0.00000

Mulliken charges with hydrogens summed into heavy atoms:

1 C 0.281031  
2 C 0.198718  
3 N -0.400728  
4 C 0.155373  
5 C 0.612172  
6 N -0.232303  
9 C 0.558798  
10 N -0.034421  
13 O -0.562070  
14 O -0.576570

Electronic spatial extent (au):  $\langle R^{*2} \rangle =$  1294.9345

Charge= 0.0000 electrons
